# Supplementary material
Source: PubMed Central journal article supplement (PMC3325798)

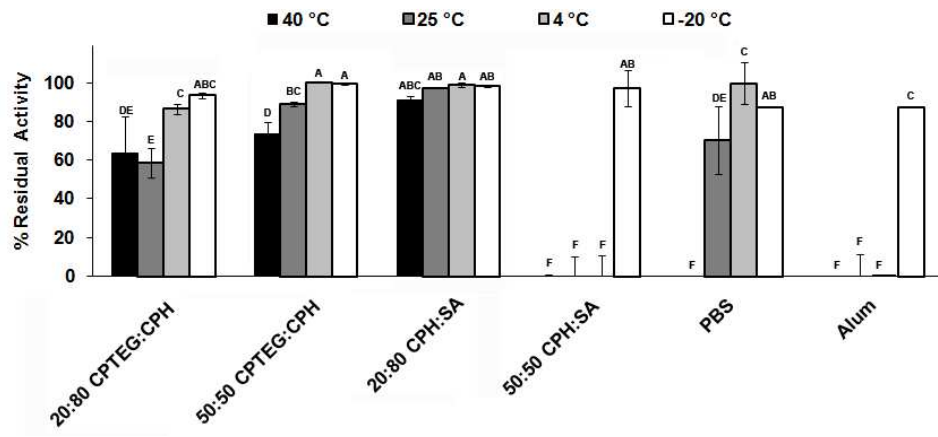

74x33mm (300 x 300 DPI)

Supplement: NIHMS365469-supplement-1_si_001.pdf [file NIHMS365469-supplement-1_si_001.pdf]

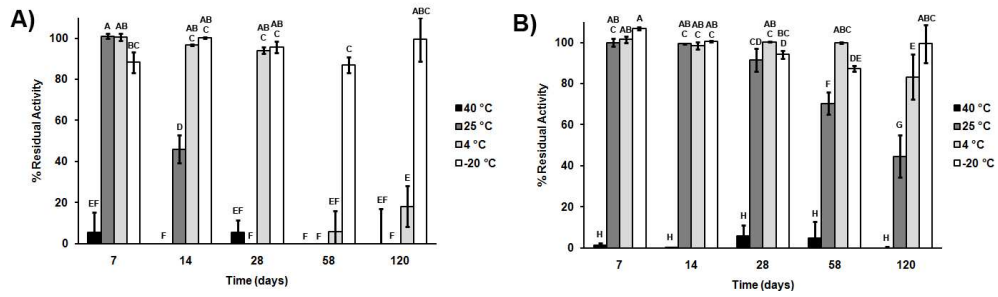

118x34mm (300 x 300 DPI)

Supplement: NIHMS365469-supplement-2_si_002.pdf [file NIHMS365469-supplement-2_si_002.pdf]
